# Supplementary material
Source: MDPI journal article supplement (https://www.mdpi.com/2077-1312/9/4/395)
Supplement: s1 [file s1]

# Coagulant Plus *Bacillus nitratireducens* Fermentation Broth Technique Provides a Rapid Algicidal Effect of Toxic Red Tide Dinoflagellate

Balaji Prasath Barathan <sup>1,2,†</sup>, Hong Lin <sup>1</sup>, Yuping Su <sup>1,2,\*</sup>, Wan N. Zheng <sup>1</sup>, Wang Ying <sup>1,†</sup> and Hong Yang <sup>3</sup>

<sup>1</sup> College of Environmental Science and Engineering, Fujian Normal University, Fuzhou 350007, China; b.balajiprasath@gmail.com (B.P.B.); honglin0108@126.com (H.L.); wanning.zheng@foxmail.com (W.N.Z.); wing@163.com (W.Y.);

<sup>2</sup> Fujian Key Laboratory of Pollution Control and Resource Recycling, Fuzhou 350007, China

<sup>3</sup> Department of Geography and Environmental Science, University of Reading, Reading, Whiteknights, RG6 6AB, UK; hongyanghy@gmail.com

\* Correspondence: ypsu@fjnu.edu.cn

† Contributed equally to this study.

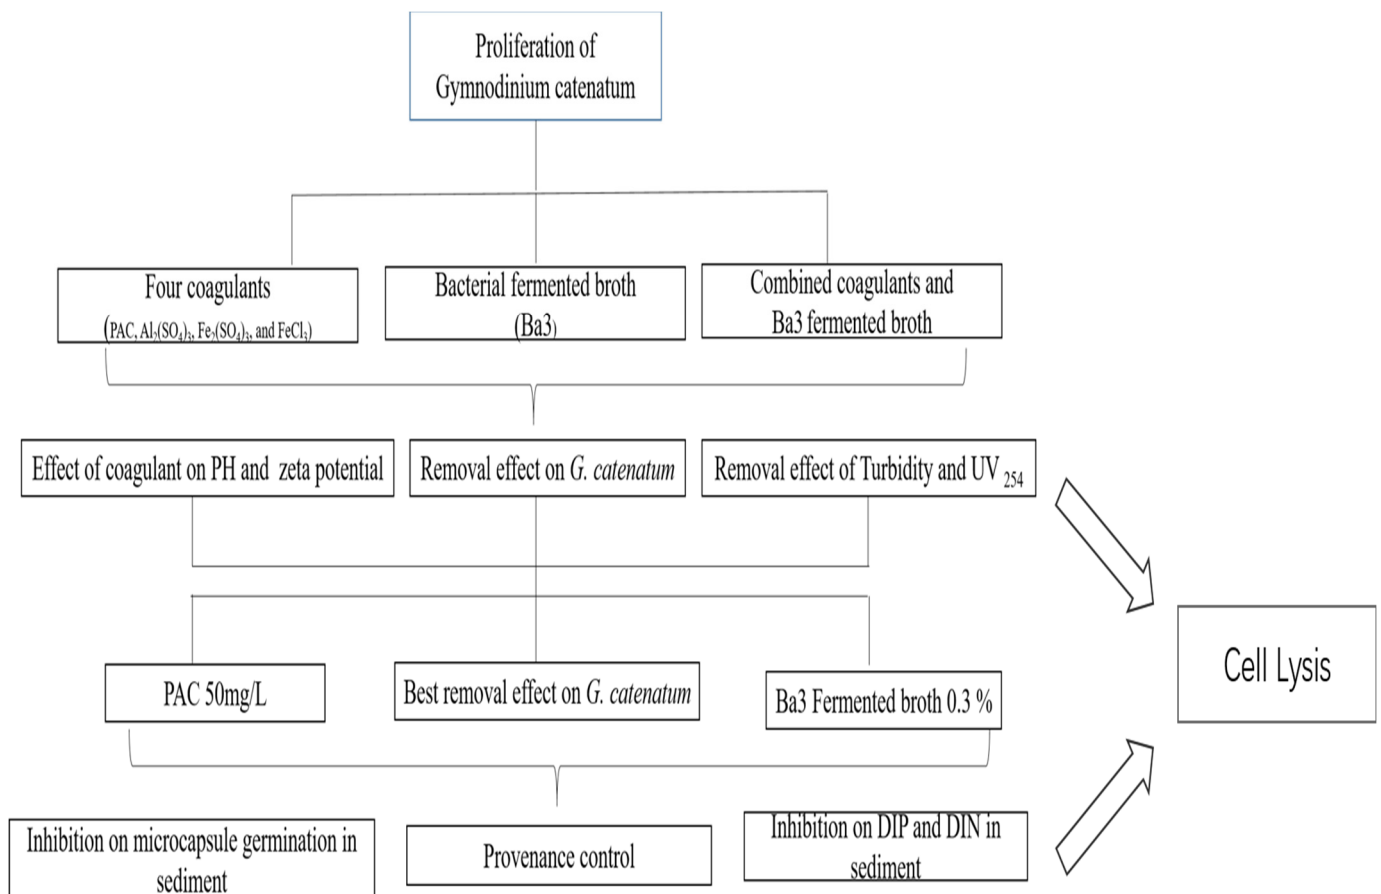

**Figure S1.** A schematic design of the study on the proliferation regulation of *Bacillus* Sp. Fermentation broth combined with coagulant on *G. catenatum*.

**Table 2.** A schematic design of the study on the control of cyst germination of *Gymnodinium catenum* by the combination of coagulant and fermentation broth.

| Group | Type of sediment                  | Inhibitor | Dosage        |
|-------|-----------------------------------|-----------|---------------|
| I-1   | sediment                          | Control   | 0             |
| I-2   | sediment                          | PAC       | 50mg/L        |
| I-3   | sediment                          | PAC + Ba3 | 50mg/L + 0.3% |
| II-1  | Sediment + <i>G.catenum</i> cysts | Control   | 0             |
| II-2  | Sediment + <i>G.catenum</i> cysts | PAC       | 50mg/L        |
| II-3  | Sediment + <i>G.catenum</i> cysts | PAC + Ba3 | 50mg/L + 0.3% |
